# Supplementary material for: Bah humbug! Association between sending Christmas cards to trial participants and trial retention: randomised study within a trial conducted simultaneously across eight host trials
Source: PubMed Central journal article supplement (PMC8669570; doi:10.1136/bmj-2021-067742), 2021-12-14
Supplement: cole067742.ww1.pdf [file cole067742.ww1.pdf]

**Bah humbug! Association between sending Christmas cards to trial participants and trial retention: randomised study within a trial conducted simultaneously across eight host trials**

**Supplementary Material**

Table A: Details on the proximity of the completion of the follow-up to when it was due, and results of the Cox Proportional Hazard model for all trials, and combined meta-analysis results

|                  | <b>Sent a card:<br/>Days between<br/>due and<br/>completion<br/>Mean (SD)<br/>(Min, Max)</b> | <b>Not sent a<br/>card:<br/>Days between<br/>due and<br/>completion<br/>Mean (SD)<br/>(Min, Max)</b> | <b>Overall:<br/>Days between<br/>due and<br/>completion<br/>Mean (SD)<br/>(Min, Max)</b> | <b>Hazards Ratio<br/>(95% CI)*</b> | <b>p-value</b> |
|------------------|----------------------------------------------------------------------------------------------|------------------------------------------------------------------------------------------------------|------------------------------------------------------------------------------------------|------------------------------------|----------------|
| <b>C-Gall</b>    | 53.2 (40.9)<br>(4, 156)                                                                      | 57.3 (46.0)<br>(3, 158)                                                                              | 55.2 (43.4)<br>(3, 158)                                                                  | 1.08<br>(0.81 to 1.43)             | 0.62           |
| <b>CPIT-3</b>    | 10.1 (14.3)<br>(0, 76)                                                                       | 10.5 (16.2)<br>(0, 83)                                                                               | 10.3 (15.3)<br>(0, 83)                                                                   | 1.02<br>(0.81 to 1.29)             | 0.85           |
| <b>DISC</b>      | 12.5 (46.5)<br>(-71, 335)                                                                    | 8.7 (22.2)<br>(-42, 156)                                                                             | 10.7 (36.6)<br>(-71, 335)                                                                | 0.94<br>(0.71 to 1.23)             | 0.65           |
| <b>FUTURE</b>    | 38.3 (44.3)<br>(1, 188)                                                                      | 41.5 (39.9)<br>(1, 172)                                                                              | 39.8 (42.2)<br>(1, 188)                                                                  | 1.05<br>(0.83 to 1.33)             | 0.71           |
| <b>ProFHER-2</b> | 1.6 (13.9)<br>(-29, 26)                                                                      | 7.3 (14.1)<br>(-16, 28)                                                                              | 4.2 (14.0)<br>(-29, 28)                                                                  | 1.25<br>(0.57 to 2.73)             | 0.57           |
| <b>PurE</b>      | 14.7 (28.2)<br>(-1, 103)                                                                     | 5.9 (9.7)<br>(-1, 38)                                                                                | 9.5 (19.6)<br>(-1, 103)                                                                  | 0.87<br>(0.43 to 1.79)             | 0.71           |
| <b>REFLECT</b>   | 25.7 (25.5)<br>(0, 132)                                                                      | 23.5 (23.7)<br>(-8, 121)                                                                             | 24.6 (24.6)<br>(-8, 132)                                                                 | 0.95<br>(0.73 to 1.25)             | 0.72           |
| <b>SWHSI-2</b>   | 16.5 (18.7)<br>(-3, 72)                                                                      | 30.5 (56.9)<br>(4, 218)                                                                              | 23.2 (41.5)<br>(-3, 218)                                                                 | 1.30<br>(0.61 to 2.77)             | 0.50           |
| <b>Overall</b>   | 26.1 (38.5)<br>(-71, 335)                                                                    | 26.4 (35.9)<br>(-42, 218)                                                                            | 26.3 (37.2)<br>(-71, 335)                                                                | 1.01<br>(0.91 to 1.13)             | 0.80           |

\*Reference arm is the intervention arm

**Sensitivity analyses**

Primary outcome further adjusted for gender

Due to an imbalance of gender in some of the host trials, a sensitivity analysis was undertaken. The results for each trial can be found in Table B. The results were robust and when combined in a meta-analysis produced an OR of 0.96, 95% CI 0.71 to 1.30, p = 0.78. The results suggest a negative impact on retention when sending a Christmas card, although these are non-significant.

Table B: Results of sensitivity analysis which further adjusted the primary analysis model for gender

|                  | <b>Sent a card:<br/>% Complete<br/>(n complete<br/>/n due)</b> | <b>Not sent a<br/>card:<br/>% Complete<br/>(n complete<br/>/n due)</b> | <b>Overall:<br/>% Complete<br/>(n complete<br/>/n due)</b> | <b>Adjusted Odds<br/>Ratio (95%<br/>CI)*</b> | <b>p-value</b> |
|------------------|----------------------------------------------------------------|------------------------------------------------------------------------|------------------------------------------------------------|----------------------------------------------|----------------|
| <b>C-Gall</b>    | 87.3%<br>(96/110)                                              | 86.1%<br>(93/108)                                                      | 86.7%<br>(189/218)                                         | 1.09<br>(0.49 to 2.38)                       | 0.84           |
| <b>CPIT-3</b>    | 90.4%<br>(142/157)                                             | 89.7%<br>(139/155)                                                     | 90.0%<br>(281/312)                                         | 1.09<br>(0.52 to 2.30)                       | 0.81           |
| <b>DISC</b>      | 84.0%<br>(105/125)                                             | 87.2%<br>(102/117)                                                     | 85.5%<br>(207/242)                                         | 0.78<br>(0.38 to 1.61)                       | 0.50           |
| <b>FUTURE</b>    | 94.8%<br>(147/155)                                             | 96.4%<br>(133/138)                                                     | 95.6%<br>(280/293)                                         | 0.66<br>(0.21 to 2.08)                       | 0.48           |
| <b>ProFHER-2</b> | 82.4%<br>(14/17)                                               | 80.0%<br>(12/15)                                                       | 81.3%<br>(26/32)                                           | 1.04<br>(0.16 to 6.75)                       | 0.96           |
| <b>PurE</b>      | 65.0%<br>(13/20)                                               | 70.4%<br>(19/27)                                                       | 68.1%<br>(32/47)                                           | 0.84<br>(0.23 to 3.02)                       | 0.79           |
| <b>REFLECT</b>   | 75.0%<br>(108/14)                                              | 75.4%<br>(104/138)                                                     | 75.2%<br>(212/282)                                         | 0.98<br>(0.57 to 1.69)                       | 0.95           |
| <b>SWHSI-2</b>   | 66.7%<br>(14/21)                                               | 59.1%<br>(13/22)                                                       | 62.8%<br>(27/43)                                           | 1.36<br>(0.38 to 4.84)                       | 0.64           |
| <b>Overall</b>   | 85.3%<br>(639/749)                                             | 85.4 %<br>(615/720)                                                    | 85.4 %<br>(1,254/1,469)                                    | 0.96<br>(0.71 to 1.30)                       | 0.78           |

\*Reference arm is the intervention arm

#### Time to completion: postal only

When repeating the time to completion analysis, with only those follow-ups that were done via postal questionnaire, the results were found to be similar to that when including all participants. This analysis affected three trials: CPIT-3, DISC and ProFHER-2. All participants from CPIT-3 were excluded. The full details can be found in Table C. A combined HR of 1.03 (95% CI 0.89 to 1.18, p=0.72) suggests a slight benefit from receiving the card, but the results are not statistically significant.

Table C: Results of sensitivity analysis where the time to completion analysis was repeated including only postal follow-ups.

|                   | <b>Sent a card:<br/>Days between<br/>due and<br/>completion<br/>Mean (SD)<br/>(Min, Max)</b> | <b>Not sent a<br/>card:<br/>Days between<br/>due and<br/>completion<br/>Mean (SD)<br/>(Min, Max)</b> | <b>Overall:<br/>Days between<br/>due and<br/>completion<br/>Mean (SD)<br/>(Min, Max)</b> | <b>Hazards Ratio<br/>(95% CI)*</b> | <b>p-value</b> |
|-------------------|----------------------------------------------------------------------------------------------|------------------------------------------------------------------------------------------------------|------------------------------------------------------------------------------------------|------------------------------------|----------------|
| <b>C-Gall</b>     | N=96<br>53.2 (40.9)<br>(4, 156)                                                              | N=93<br>57.3 (46.0)<br>(3, 158)                                                                      | N=189<br>55.2 (43.4)<br>(3, 158)                                                         | 1.08<br>(0.81 to 1.43)             | 0.62           |
| <b>CPIT-3†</b>    | N=0<br>-                                                                                     | N=0<br>-                                                                                             | N=0<br>-                                                                                 | -                                  | -              |
| <b>DISC†</b>      | N=25<br>2.2 (4.9)<br>(-1, 17)                                                                | N=22<br>1.6 (6.0)<br>(-1, 28)                                                                        | N=47<br>2.0 (5.4)<br>(-1, 28)                                                            | 0.91<br>(0.51 to 1.62)             | 0.76           |
| <b>FUTURE</b>     | N=147<br>38.3 (44.3)<br>(1, 188)                                                             | N=133<br>41.5 (39.9)<br>(1, 172)                                                                     | N=280<br>39.8 (42.2)<br>(1, 188)                                                         | 1.05<br>(0.83 to 1.33)             | 0.71           |
| <b>ProFHER-2†</b> | N=8<br>4.3 (10.1)<br>(-7, 24)                                                                | N=5<br>11.4 (13.6)<br>(-1, 28)                                                                       | N=13<br>7.0 (11.6)<br>(-7, 28)                                                           | 1.73<br>(0.52 to 5.73)             | 0.37           |
| <b>PurE</b>       | N=13<br>14.7 (28.2)<br>(-1, 103)                                                             | N=19<br>5.9 (9.7)<br>(-1, 38)                                                                        | N=32<br>9.5 (19.6)<br>(-1, 103)                                                          | 0.87<br>(0.43 to 1.79)             | 0.71           |
| <b>REFLECT</b>    | N=108<br>25.7 (25.5)<br>(0, 132)                                                             | N=104<br>23.5 (23.7)<br>(-8, 121)                                                                    | N=212<br>24.6 (24.6)<br>(-8, 132)                                                        | 0.95<br>(0.73 to 1.25)             | 0.72           |
| <b>SWHSI-2</b>    | N=14<br>16.5 (18.7)<br>(-3, 72)                                                              | N=13<br>30.5 (56.9)<br>(4, 218)                                                                      | N=27<br>23.2 (41.5)<br>(-3, 218)                                                         | 1.30<br>(0.61 to 2.77)             | 0.50           |
| <b>Overall</b>    | N=411<br>34.1 (38.8)<br>(-7, 188)                                                            | N=389<br>35.7 (39.8)<br>(-8, 218)                                                                    | N=800<br>34.9 (39.3)<br>(-8, 218)                                                        | 1.03<br>(0.89 to 1.18)             | 0.72           |

\*Reference arm is the intervention arm † some participants have been excluded from these trials as part of the sensitivity analysis
